# Supplementary material for: Most chromatin interactions are not in linkage disequilibrium
Source: HighWire-hosted journal article supplement (doi:10.1101/gr.238022.118), 2019-01-07
Supplement: Supplemental_Fig_S1.pdf [file Supplemental_Fig_S1.pdf]

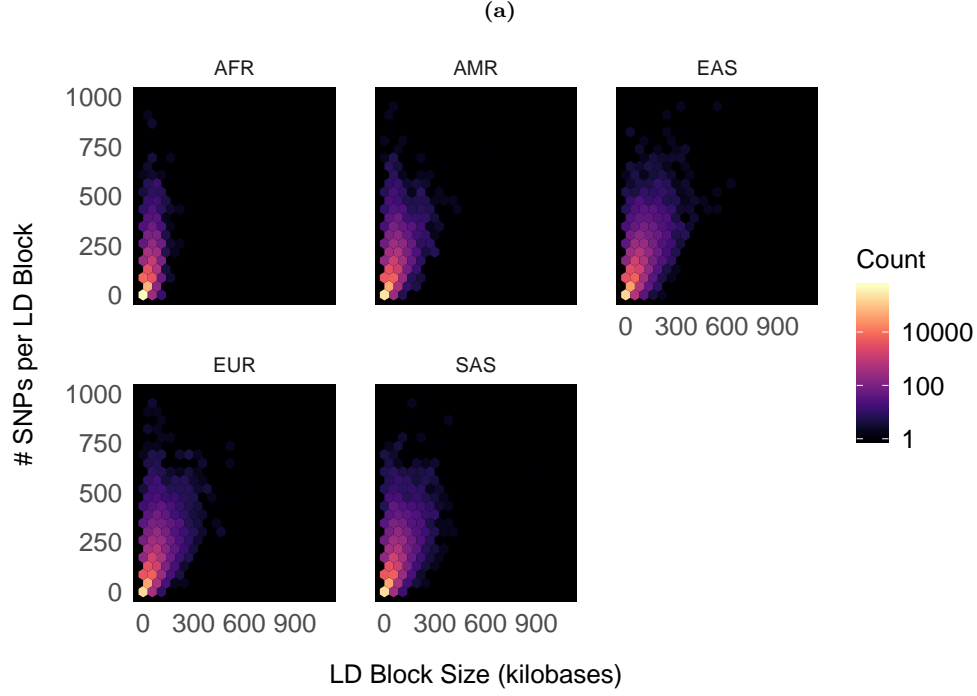

(b)

| Super Pop. | LD Block Size Bin (kb) | Median # SNPs |
|------------|------------------------|---------------|
| AFR        | [0.002, 0.239)         | 2             |
| AFR        | [0.239, 1.108)         | 3             |
| AFR        | [1.108, 3.987)         | 8             |
| AFR        | [3.987, 289.270]       | 27            |
| AMR        | [0.002, 0.359)         | 2             |
| AMR        | [0.359, 2.075)         | 4             |
| AMR        | [2.075, 7.773)         | 11            |
| AMR        | [7.773, 967.830]       | 40            |
| EAS        | [0.002, 0.422)         | 2             |
| EAS        | [0.422, 2.831)         | 4             |
| EAS        | [2.831, 11.010)        | 14            |
| EAS        | [11.010, 1084.750]     | 51            |
| EUR        | [0.002, 0.39)          | 2             |
| EUR        | [0.390, 2.50)          | 4             |
| EUR        | [2.500, 9.71)          | 13            |
| EUR        | [9.713, 973.50]        | 49            |
| SAS        | [0.002, 0.369)         | 2             |
| SAS        | [0.369, 2.277)         | 4             |
| SAS        | [2.277, 8.784)         | 13            |
| SAS        | [8.784, 974.911]       | 46            |

**Supplemental Figure 1.** The number of SNPs in an LD block scales with its length (kb, quartile bins). Most SNPs are in LD blocks only several kb in length, though some are in much longer blocks along with dozens or even hundreds of other SNPs.
