# Supplementary material for: Most chromatin interactions are not in linkage disequilibrium
Source: HighWire-hosted journal article supplement (doi:10.1101/gr.238022.118), 2019-01-07
Supplement: Supplemental_Fig_S3.pdf [file Supplemental_Fig_S3.pdf]

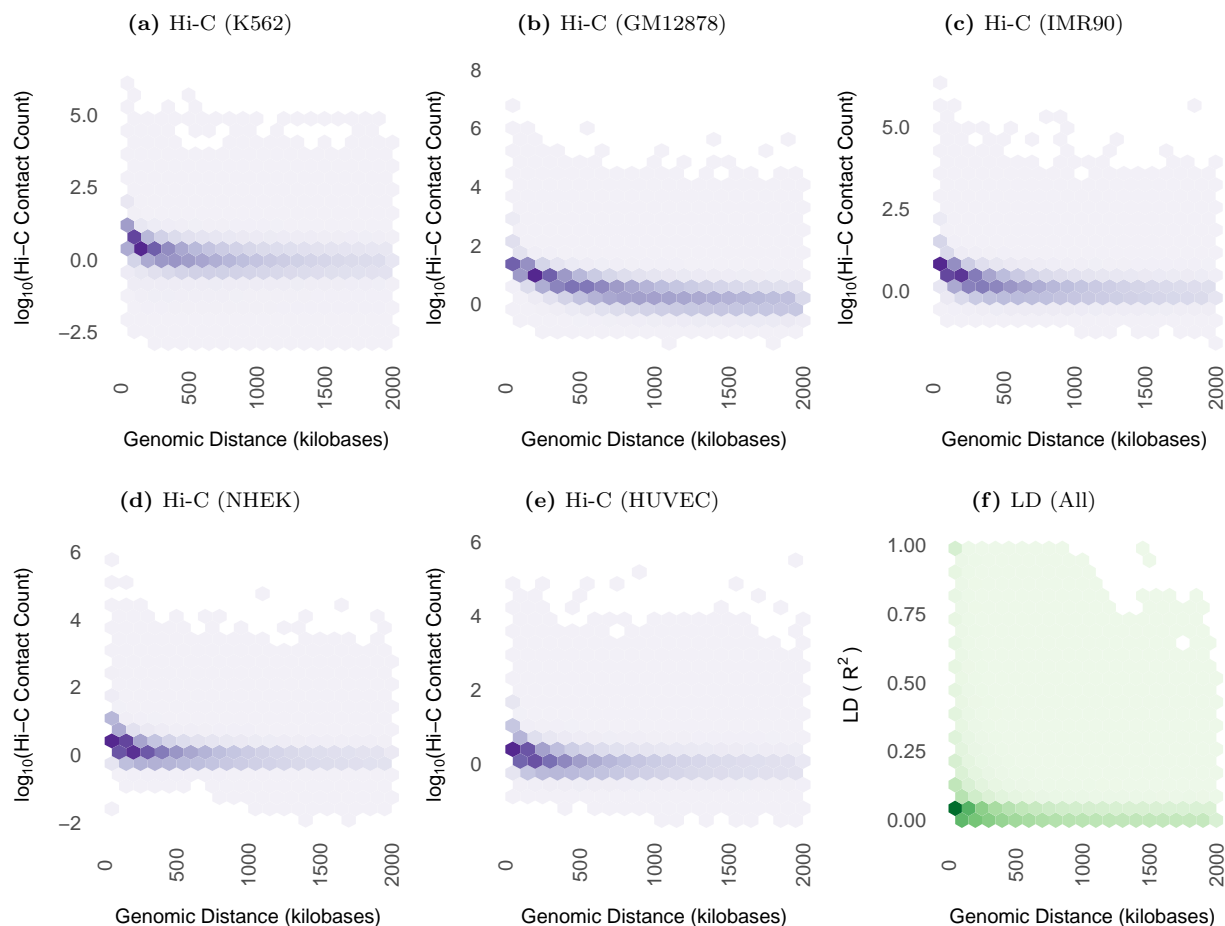

**Supplemental Figure 3.** Both Hi-C contact frequency (Rao et al. 2014) (*A-E*) and (*F*) LD are anti-correlated with genomic distance (Spearman  $\rho$  between  $-0.5$  and  $-0.71$  for Hi-C across cell lines;  $\rho \approx -0.52$  for LD). All plots display non-zero values from their respective datasets. LD decays towards zero at much shorter genomic distance than contact frequency, with most high LD SNP pairs concentrated below 50kb. Hi-C contacts are common at longer genomic distances up to and exceeding the median length of contact domains (250kb) or TADs (840kb). Supplemental Figure 4 shows nearly identical LD scaling per super-population. (*F*) 836 million biallelic SNP pairs on chromosome 14, representative of other chromosomes.
