# Supplementary material for: Most chromatin interactions are not in linkage disequilibrium
Source: HighWire-hosted journal article supplement (doi:10.1101/gr.238022.118), 2019-01-07
Supplement: Supplemental_Fig_S5.pdf [file Supplemental_Fig_S5.pdf]

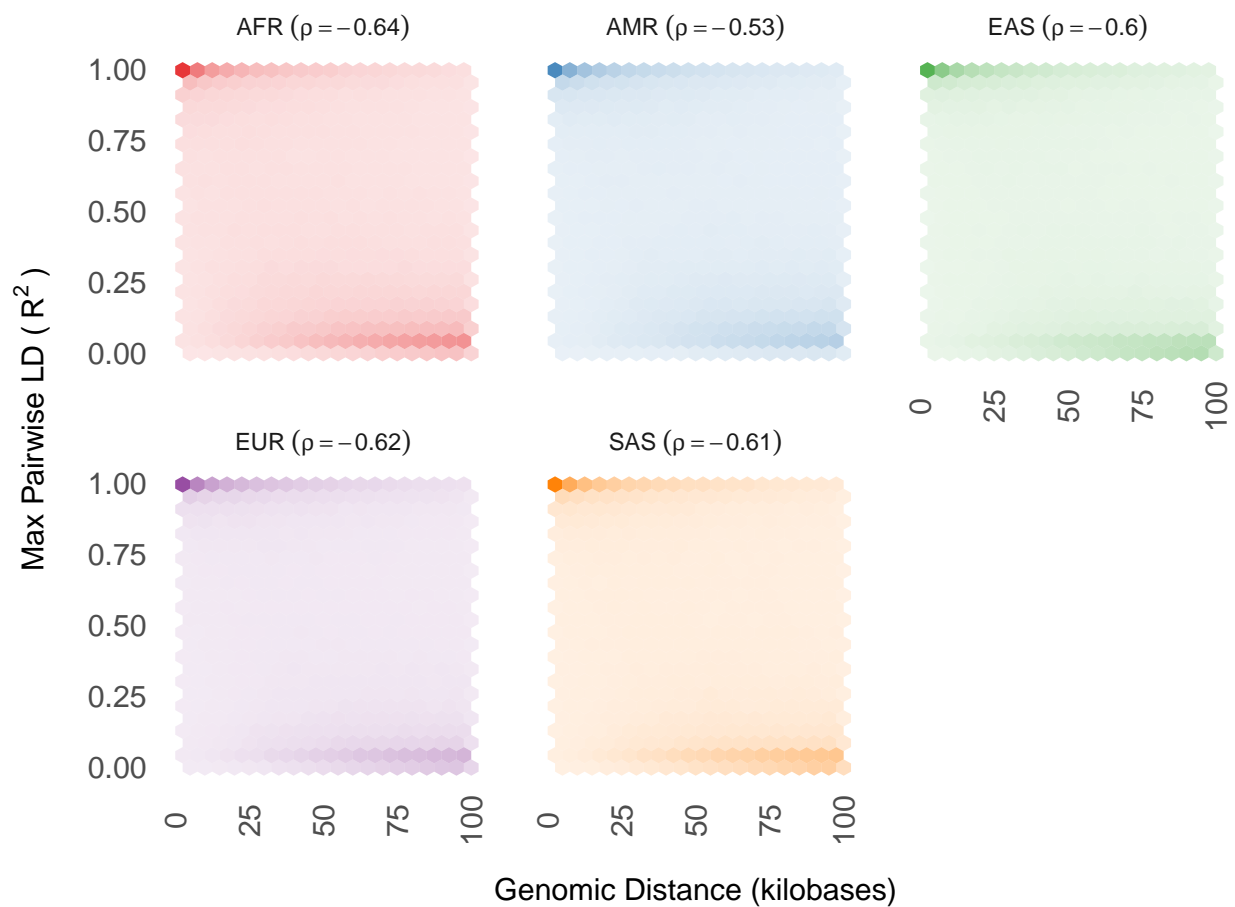

**Supplemental Figure 5.** Scaling of LD with genomic distance for SNPs located on statistically significant chromatin interactions shows moderate anti-correlation for all super-populations. Figure 3 shows combined LD scaling (not restricted to interacting chromatin) and observed Hi-C contact frequency scaling by cell line.
