# Supplementary material for: Most chromatin interactions are not in linkage disequilibrium
Source: HighWire-hosted journal article supplement (doi:10.1101/gr.238022.118), 2019-01-07
Supplement: Supplemental_Fig_S8.pdf [file Supplemental_Fig_S8.pdf]

(a) LD Blocks to Contact Domains

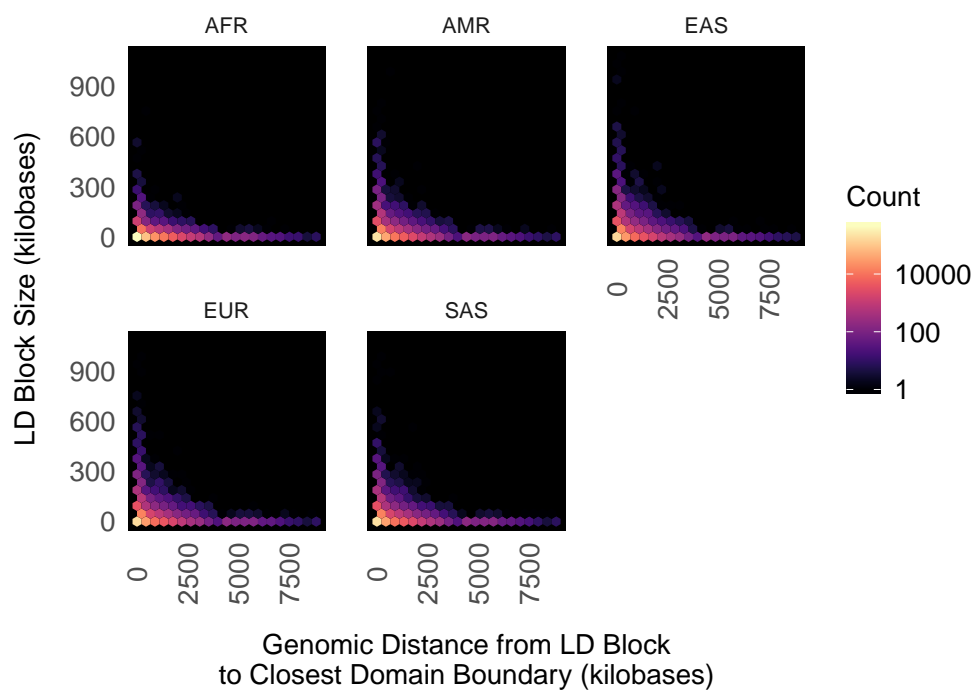

(b) LD Blocks to Contact Domains (zoomed)

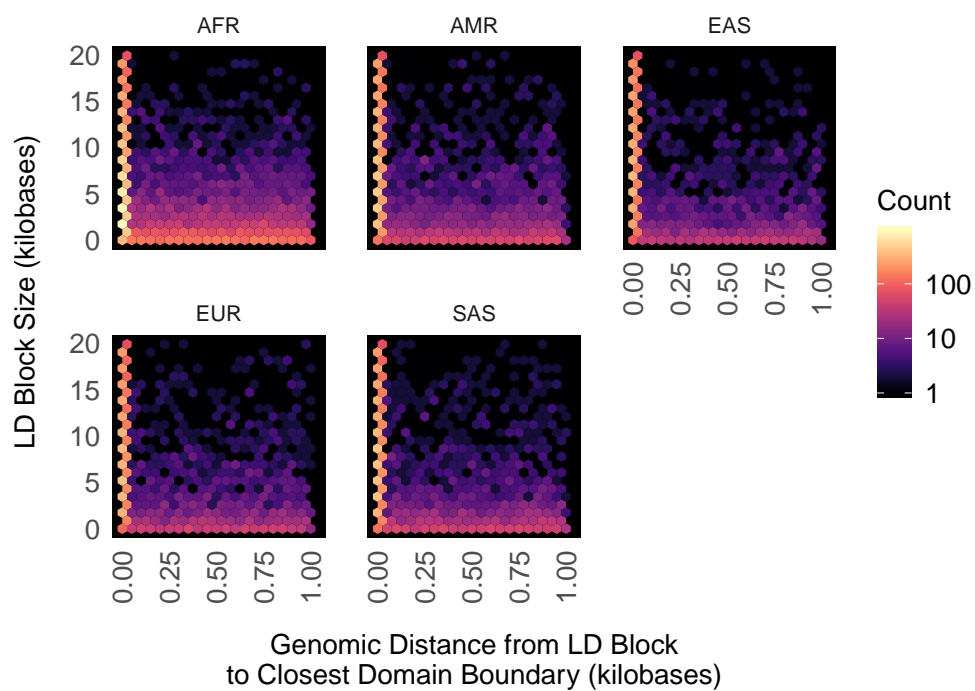

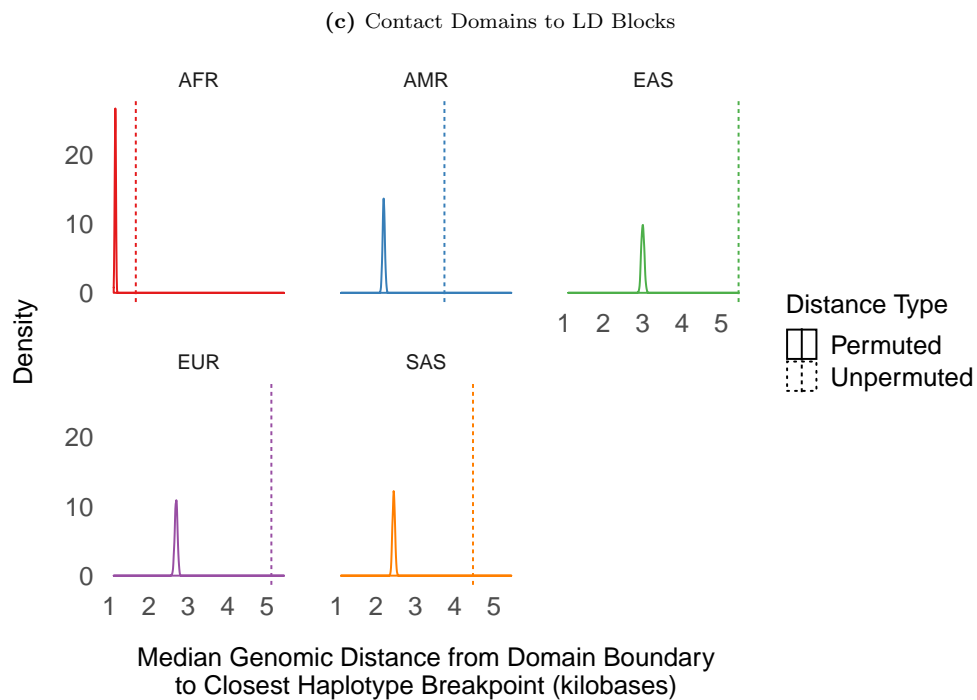

**Supplemental Figure 8.** (A) The size of LD blocks as a function of distance to the closest contact domain (GM12878). Block sizes increase as they approach domain boundaries, with order-of-magnitude increases for blocks that overlap domain boundaries (distance = 0). (B) The magnitude of increase is apparent at the kilobase scale. (C) The distance from domain boundaries to the nearest LD block boundary, showing the distance distribution for 1000 permutations of LD block locations compared to the non-permuted distance. For all super-populations, LD block boundaries are further away from contact domain boundaries than expected by chance. Combined, this suggests recombination tends to avoid contact domain boundaries.
