# Supplementary material for: Most chromatin interactions are not in linkage disequilibrium
Source: HighWire-hosted journal article supplement (doi:10.1101/gr.238022.118), 2019-01-07
Supplement: Supplemental_Fig_S9.pdf [file Supplemental_Fig_S9.pdf]

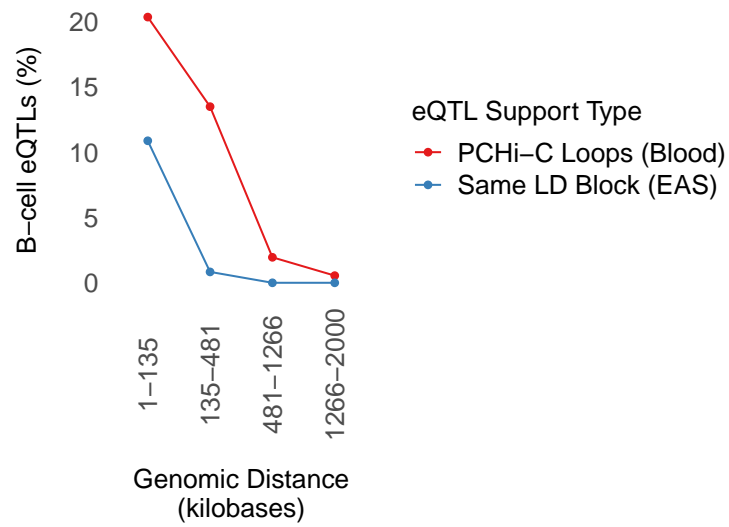

**Supplemental Figure 9.** Percent of B-cell eQTLs (Fairfax et al. 2012) supported by B-cell PCHi-C interactions (Javierre et al. 2016), compared to eQTLs in the same LD block with their target gene (EAS super-population).
